# Supplementary material for: Tumor-skin invasion is a reliable risk factor for poor prognosis in superficial soft tissue sarcomas
Source: PubMed Central journal article supplement (PMC9439222; doi:10.1371/journal.pone.0274077), 2022-09-02
Supplement: pone.0274077.s001.pdf [file pone.0274077.s001.pdf]

## Clinical information about cases

| Case | Age | Sex | Final Pathological Diagnosis                     | Location  | Size (cm) | Distant metastasis at initial diagnosis | Skin invasion | Outcome | Survival period(months) |
|------|-----|-----|--------------------------------------------------|-----------|-----------|-----------------------------------------|---------------|---------|-------------------------|
| 1    | 69  | M   | Dedifferentiated liposarcoma                     | Chest     | 5         | Negative                                | Negative      | DOD     | 28                      |
| 2    | 75  | F   | Epithelioid sarcoma                              | Neck      | 8         | Negative                                | Negative      | CDF     | 25                      |
| 3    | 84  | F   | Dedifferentiated liposarcoma                     | Femur     | 5         | Negative                                | Positive      | DOD     | 23                      |
| 4    | 81  | F   | Dedifferentiated liposarcoma                     | Lower leg | 2         | Negative                                | Negative      | NED     | 111                     |
| 5    | 82  | M   | Myxofibrosarcoma                                 | Chest     | 5         | Negative                                | Positive      | DOAD    | 76                      |
| 6    | 45  | F   | Synovial sarcoma                                 | Foot      | 1         | Negative                                | Negative      | CDF     | 71                      |
| 7    | 25  | F   | Solitary fibrous tumor                           | Abdomen   | 8         | Negative                                | Negative      | CDF     | 60                      |
| 8    | 46  | M   | Ossifying fibromyxoid tumor                      | Upper arm | 3         | Negative                                | Negative      | NED     | 54                      |
| 9    | 87  | M   | Undifferentiated pleomorphic sarcoma             | Thigh     | 11        | Negative                                | Positive      | AWD     | 21                      |
| 10   | 79  | M   | Pleomorphic liposarcoma                          | Hip       | 3         | Negative                                | Negative      | DOD     | 3                       |
| 11   | 78  | F   | Low grade fibromyxoid sarcoma                    | Lower leg | 2         | Negative                                | Negative      | CDF     | 28                      |
| 12   | 78  | F   | Atypical lipomatous tumor                        | Femur     | 10        | Negative                                | Negative      | DOAD    | 96                      |
| 13   | 64  | F   | Pleomorphic liposarcoma                          | Femur     | 2         | Negative                                | Negative      | NED     | 144                     |
| 14   | 37  | M   | Clear cell sarcoma                               | Femur     | 2         | Negative                                | Negative      | DOD     | 24                      |
| 15   | 71  | M   | Low grade myxofibrosarcoma                       | Femur     | 3         | Negative                                | Negative      | DOD     | 89                      |
| 16   | 71  | F   | Dedifferentiated liposarcoma                     | Forearm   | 3         | Negative                                | Negative      | NED     | 114                     |
| 17   | 34  | M   | Dermatofibrosarcoma protuberans                  | Shoulder  | 3         | Negative                                | Negative      | NED     | 129                     |
| 18   | 83  | M   | Leiomyosarcoma                                   | Lower leg | 4         | Negative                                | Negative      | CDF     | 34                      |
| 19   | 80  | F   | Pleomorphic liposarcoma                          | Lower leg | 5         | Negative                                | Negative      | CDF     | 115                     |
| 20   | 79  | F   | Pleomorphic liposarcoma                          | Lower leg | 2         | Negative                                | Negative      | NED     | 114                     |
| 21   | 45  | M   | Myxoid liposarcoma                               | Femur     | 4         | Negative                                | Negative      | CDF     | 58                      |
| 22   | 46  | M   | Epithelioid sarcoma                              | Abdomen   | 6         | Positive                                | Positive      | DOD     | 6                       |
| 23   | 60  | M   | Malignant peripheral nerve sheath tumor          | Lower leg | 2         | Negative                                | Negative      | AWD     | 187                     |
| 24   | 63  | F   | Myxoid liposarcoma                               | Femur     | 7         | Negative                                | Negative      | CDF     | 76                      |
| 25   | 79  | M   | Myxoid liposarcoma                               | Femur     | 3         | Negative                                | Negative      | CDF     | 25                      |
| 26   | 61  | M   | Solitary fibrous tumor                           | Femur     | 3         | Negative                                | Negative      | CDF     | 69                      |
| 27   | 40  | M   | Epithelioid sarcoma                              | Hand      | 2         | Negative                                | Negative      | CDF     | 61                      |
| 28   | 27  | M   | Epithelioid sarcoma                              | Forearm   | 10        | Positive                                | Negative      | DOD     | 144                     |
| 29   | 41  | M   | Pleomorphic liposarcoma                          | Chest     | 10        | Positive                                | Negative      | CDF     | 152                     |
| 30   | 57  | M   | Pleomorphic liposarcoma                          | Femur     | 6         | Negative                                | Negative      | DOD     | 21                      |
| 31   | 67  | M   | Pleomorphic liposarcoma                          | Femur     | 16        | Negative                                | Negative      | CDF     | 72                      |
| 32   | 71  | F   | Leiomyosarcoma                                   | Forearm   | 8         | Negative                                | Negative      | NED     | 138                     |
| 33   | 44  | F   | Myxoid liposarcoma                               | Femur     | 9         | Negative                                | Negative      | CDF     | 68                      |
| 34   | 83  | F   | Leiomyosarcoma                                   | Femur     | 2         | Negative                                | Negative      | DOD     | 45                      |
| 35   | 83  | M   | Leiomyosarcoma                                   | Shoulder  | 15        | Positive                                | Negative      | DOD     | 3                       |
| 36   | 65  | F   | Myxofibrosarcoma                                 | Forearm   | 5         | Negative                                | Negative      | NED     | 170                     |
| 37   | 42  | M   | Synovial sarcoma                                 | Foot      | 3         | Negative                                | Negative      | CDF     | 62                      |
| 38   | 48  | M   | Dedifferentiated liposarcoma                     | Femur     | 10        | Negative                                | Negative      | CDF     | 145                     |
| 39   | 57  | M   | Solitary fibrous tumor                           | Femur     | 8         | Negative                                | Negative      | NED     | 46                      |
| 40   | 67  | F   | Myxofibrosarcoma                                 | Abdomen   | 6         | Positive                                | Negative      | DOD     | 10                      |
| 41   | 74  | M   | Myxofibrosarcoma (low grade)                     | Chest     | 3         | Negative                                | Negative      | CDF     | 50                      |
| 42   | 71  | F   | Atypical lipomatous tumor                        | Shoulder  | 7         | Negative                                | Negative      | NED     | 71                      |
| 43   | 80  | M   | Undifferentiated pleomorphic sarcoma             | Chest     | 2         | Negative                                | Negative      | NED     | 70                      |
| 44   | 55  | M   | Atypical lipomatous tumor                        | Shoulder  | 13        | Negative                                | Negative      | CDF     | 71                      |
| 45   | 85  | F   | Leiomyosarcoma                                   | Hip       | 3         | Positive                                | Negative      | NED     | 208                     |
| 46   | 41  | M   | Undifferentiated pleomorphic sarcoma             | Abdomen   | 7         | Negative                                | Positive      | DOD     | 48                      |
| 47   | 21  | F   | Alveolar soft part sarcoma                       | Lower leg | 7         | Positive                                | Positive      | DOD     | 9                       |
| 48   | 61  | M   | Malignant peripheral nerve sheath tumor          | Shoulder  | 7         | Positive                                | Positive      | DOD     | 34                      |
| 49   | 67  | M   | Pleomorphic liposarcoma                          | Shoulder  | 12        | Negative                                | Positive      | DOAD    | 84                      |
| 50   | 66  | M   | Pleomorphic liposarcoma                          | Upper arm | 9         | Positive                                | Positive      | AWD     | 98                      |
| 51   | 44  | M   | Pleomorphic liposarcoma                          | Chest     | 11        | Negative                                | Positive      | AWD     | 15                      |
| 52   | 67  | M   | Undifferentiated pleomorphic sarcoma             | Forearm   | 14        | Positive                                | Positive      | DOD     | 6                       |
| 53   | 78  | M   | Pleomorphic liposarcoma                          | Chest     | 12        | Negative                                | Positive      | AWD     | 87                      |
| 54   | 72  | F   | Atypical lipomatous tumor                        | Head      | 9         | Negative                                | Negative      | NED     | 59                      |
| 55   | 85  | F   | Myxofibrosarcoma                                 | Lower leg | 3         | Negative                                | Negative      | NED     | 160                     |
| 56   | 81  | M   | Atypical fibroxanthoma                           | Femur     | 4         | Negative                                | Negative      | CDF     | 56                      |
| 57   | 84  | F   | Myxofibrosarcoma (low grade)                     | Lower leg | 4         | Negative                                | Negative      | DOAD    | 10                      |
| 58   | 76  | M   | Myxofibrosarcoma                                 | Femur     | 10        | Negative                                | Negative      | CDF     | 14                      |
| 59   | 79  | F   | Myxofibrosarcoma                                 | Lower leg | 5         | Negative                                | Negative      | DOD     | 12                      |
| 60   | 50  | F   | Myxofibrosarcoma (low grade)                     | Upper arm | 1         | Negative                                | Negative      | NED     | 43                      |
| 61   | 84  | F   | Leiomyosarcoma                                   | Upper arm | 5         | Negative                                | Negative      | DOD     | 37                      |
| 62   | 36  | F   | Undifferentiated pleomorphic sarcoma             | Forearm   | 4         | Negative                                | Negative      | CDF     | 42                      |
| 63   | 70  | F   | Atypical lipomatous tumor                        | Lower leg | 3         | Negative                                | Negative      | CDF     | 42                      |
| 64   | 73  | F   | Undifferentiated pleomorphic sarcoma             | Femur     | 4         | Negative                                | Negative      | NED     | 45                      |
| 65   | 74  | F   | Atypical lipomatous tumor                        | Shoulder  | 2         | Negative                                | Negative      | NED     | 65                      |
| 66   | 71  | M   | Malignant peripheral nerve sheath tumor          | Lower leg | 7         | Negative                                | Negative      | AWD     | 55                      |
| 67   | 72  | F   | Myxofibrosarcoma                                 | Femur     | 5         | Negative                                | Negative      | NED     | 41                      |
| 68   | 83  | M   | Undifferentiated pleomorphic sarcoma             | Chest     | 3         | Negative                                | Negative      | NED     | 64                      |
| 69   | 82  | F   | Dedifferentiated liposarcoma                     | Femur     | 2         | Negative                                | Negative      | CDF     | 35                      |
| 70   | 58  | M   | MPNST                                            | Forearm   | 3         | Positive                                | Negative      | AWD     | 88                      |
| 71   | 71  | M   | Myxofibrosarcoma (low grade)                     | Lower leg | 4         | Negative                                | Negative      | CDF     | 60                      |
| 72   | 56  | M   | Dermatofibrosarcoma                              | Neck      | 7         | Negative                                | Negative      | CDF     | 35                      |
| 73   | 49  | M   | Undifferentiated pleomorphic sarcoma (low grade) | Foot      | 3         | Negative                                | Negative      | NED     | 30                      |
| 74   | 65  | M   | Undifferentiated pleomorphic sarcoma             | Upper arm | 9         | Negative                                | Negative      | AWD     | 31                      |
| 75   | 76  | M   | Undifferentiated pleomorphic sarcoma             | Chest     | 7         | Negative                                | Negative      | CDF     | 21                      |
| 76   | 69  | M   | Atypical lipomatous tumor                        | Chest     | 29        | Negative                                | Negative      | CDF     | 18                      |
| 77   | 75  | M   | Angiosarcoma                                     | Forearm   | 3         | Negative                                | Negative      | AWD     | 23                      |
| 78   | 53  | M   | Myxofibrosarcoma (low grade)                     | Forearm   | 3         | Negative                                | Negative      | CDF     | 19                      |
| 79   | 78  | F   | Malignant giant cell tumour of soft tissue       | Back      | 8         | Positive                                | Negative      | DOD     | 17                      |
| 80   | 21  | M   | Low grade fibromyxoid sarcoma                    | Lower leg | 4         | Negative                                | Negative      | CDF     | 19                      |
| 81   | 27  | M   | Cellular angiofibroma                            | Femur     | 6         | Negative                                | Negative      | CDF     | 8                       |
| 82   | 44  | F   | Solitary fibrous tumor                           | Femur     | 6         | Negative                                | Negative      | CDF     | 11                      |
